# Supplementary material
Source: Springer Nature journal article supplement (https://www.springermedizin.de/resource/supplementary/12916_2012_589_MOESM7_ESM.pdf/9598210)

## Treated Participants with ADHD compared with untreated ADHD

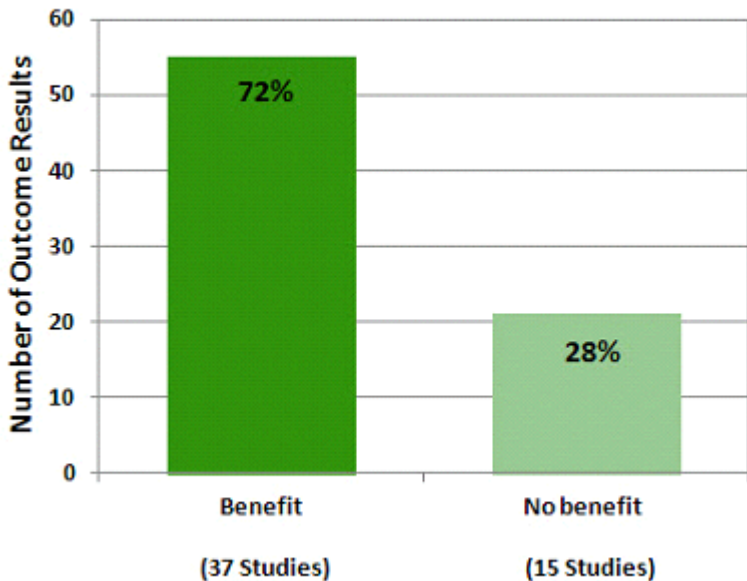

Supplement: MOESM7 [file 9598210]
